# Supplementary material
Source: Springer Nature journal article supplement (https://www.springermedizin.de/resource/supplementary/13054_2011_9909_MOESM1_ESM.pdf/9707184)

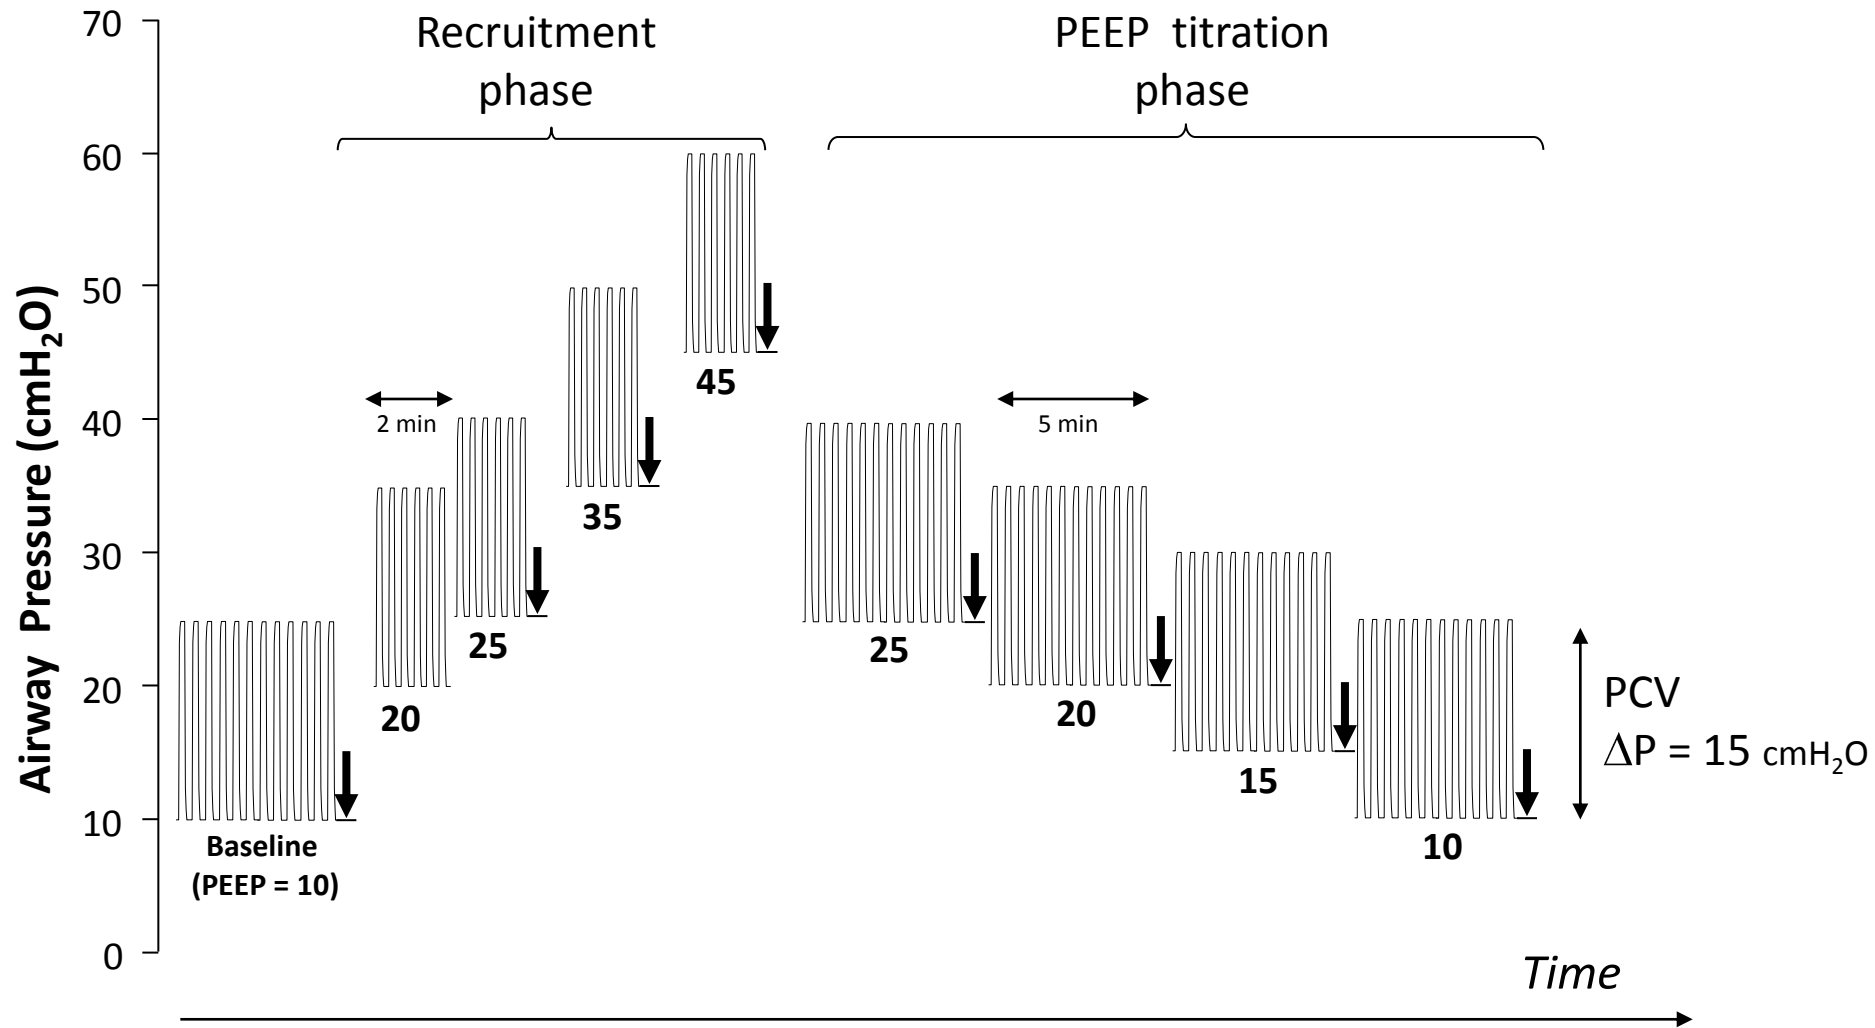

**PEEP STEPS - MAXIMUM-RECRUITMENT STRATEGY**

( ↓ : CT scan – end-expiratory pause )

Supplement: MOESM1 [file 9707184]
